# Supplementary material for: TPR is required for cytoplasmic chromatin fragment formation during senescence
Source: eLife journal article supplement (doi:10.7554/elife.101702), 2024-12-03
Supplement: fig2-data2 [file elife-101702-fig2-data2-v3.pdf]

STOP RAS  
siCTRL siTPR siCTRL siTPR  
65 — p-NF-κB/p65  
(S536)

STOP RAS  
siCTRL siTPR siCTRL siTPR  
65 — NF-κB/p65

p-NF-κB/p65  
(S536) NF-κB/p65  
STOP RAS STOP RAS  
siCTRL siTPR siCTRL siTPR siCTRL siTPR siCTRL siTPR  
140 — vinculin  
115 —

STOP RAS  
siCTRL siTPR siCTRL siTPR  
140 —  
115 —  
80 — p-IKKα/β  
(S176/180)

STOP RAS  
siCTRL siTPR siCTRL siTPR  
140 —  
115 —  
80 — IKK

IKK p-IKKα/β  
(S176/180)  
STOP RAS STOP RAS  
siCTRL siTPR siCTRL siTPR siCTRL siTPR siCTRL siTPR  
50 — β-actin  
40 —
