# Supplementary figures and images for: TPR is required for cytoplasmic chromatin fragment formation during senescence
Source: eLife journal article supplement (doi:10.7554/elife.101702), 2024-12-03

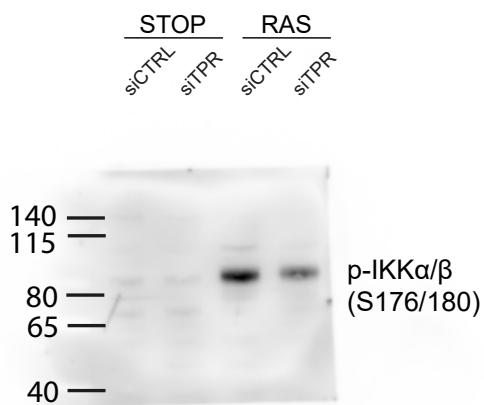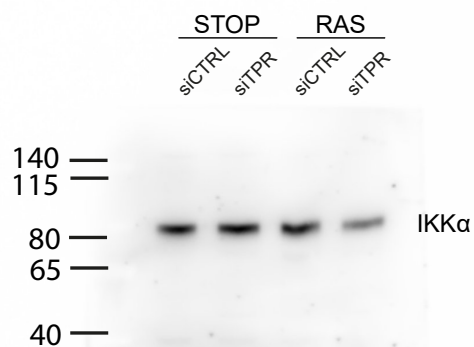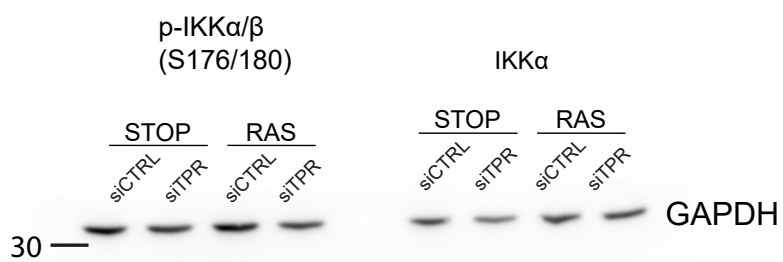

Supplement: fig2-figsupp1-data1 [file elife-101702-fig2-figsupp1-data1-v3.zip]

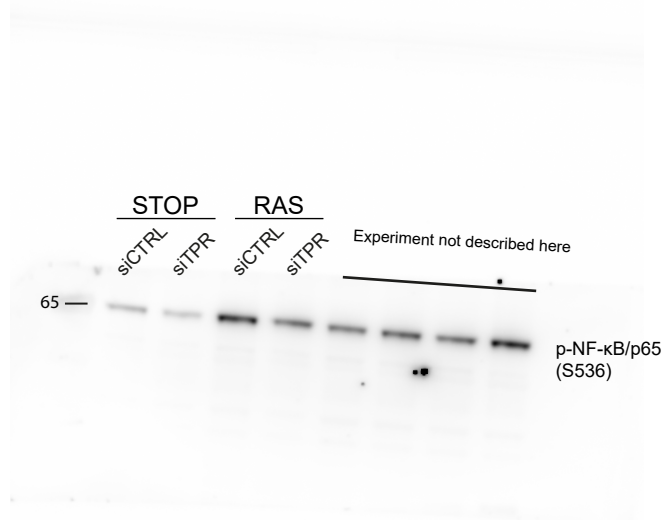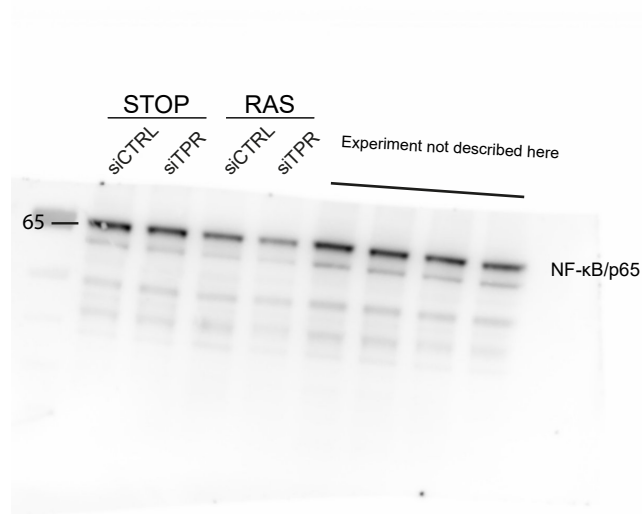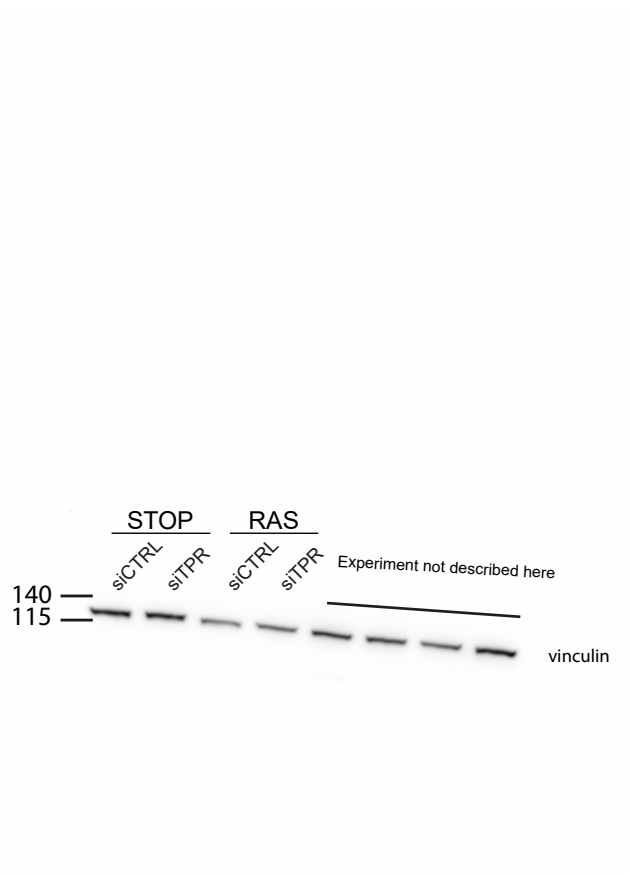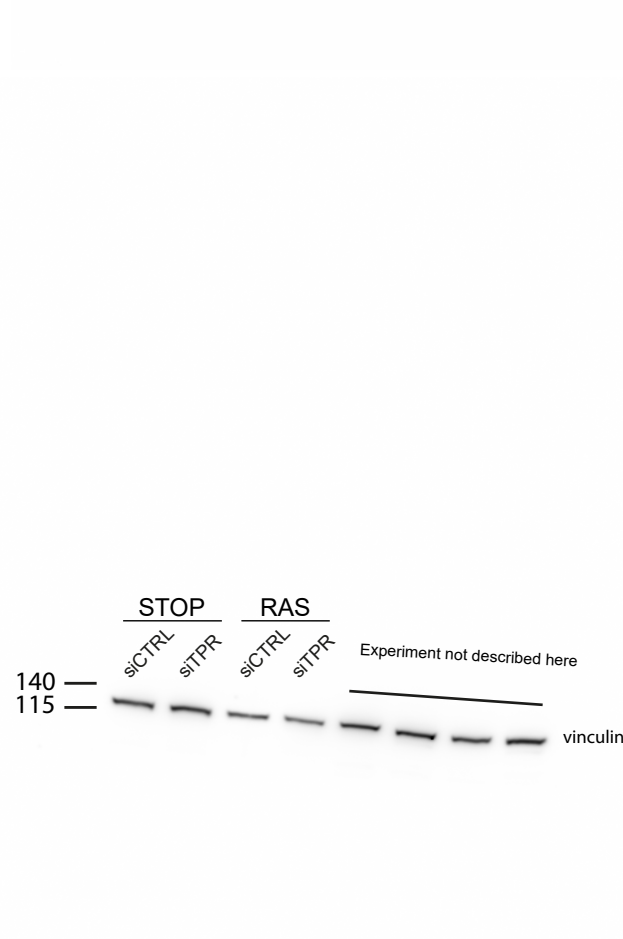

Supplement: fig2-figsupp1-data1 [file elife-101702-fig2-figsupp1-data1-v3.zip]

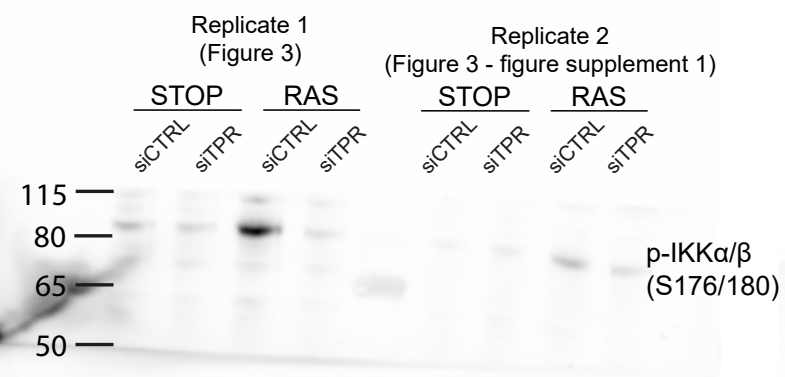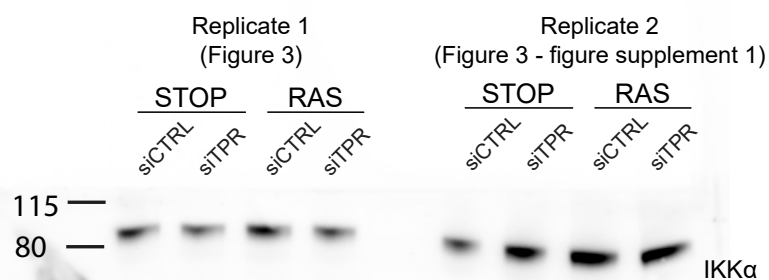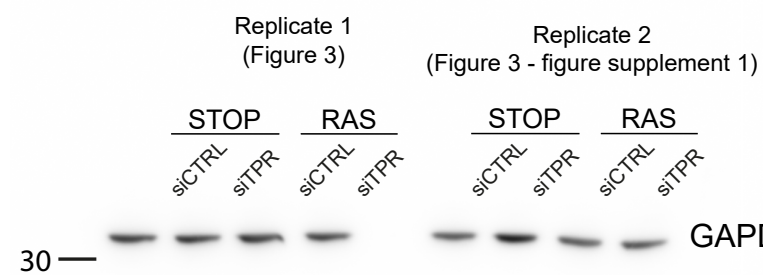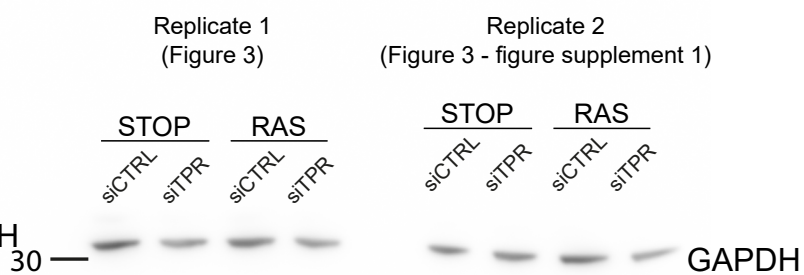

Supplement: fig3-data2 [file elife-101702-fig3-data2-v3.zip]

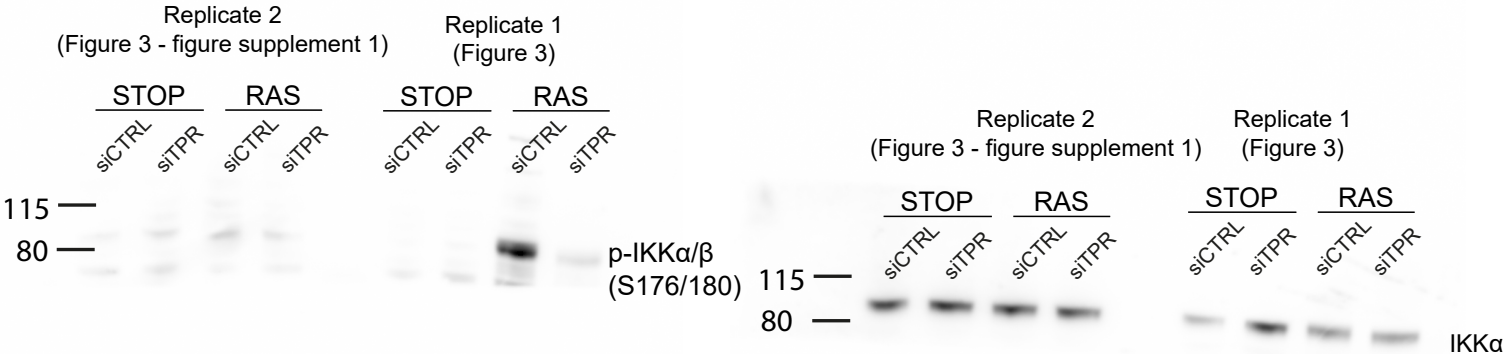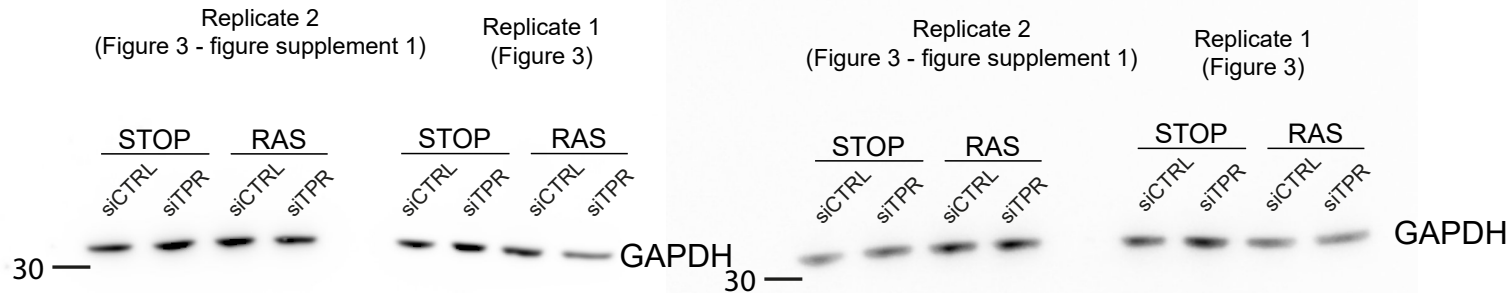

Supplement: fig3-data2 [file elife-101702-fig3-data2-v3.zip]

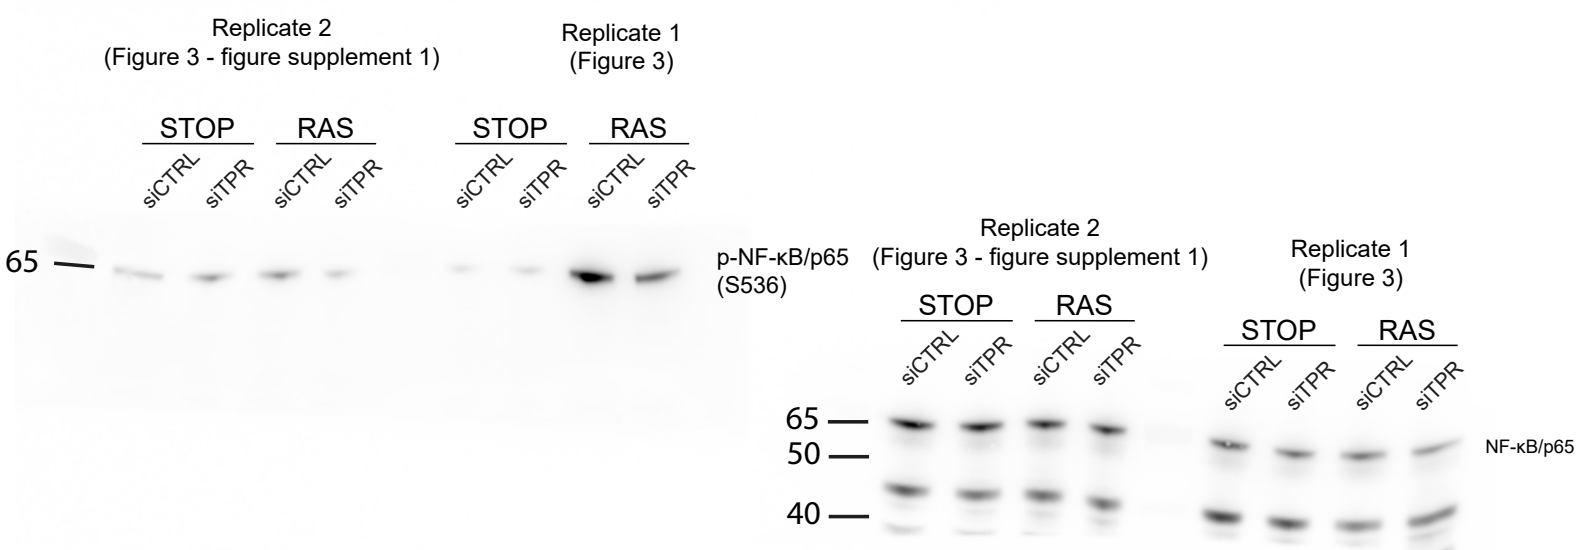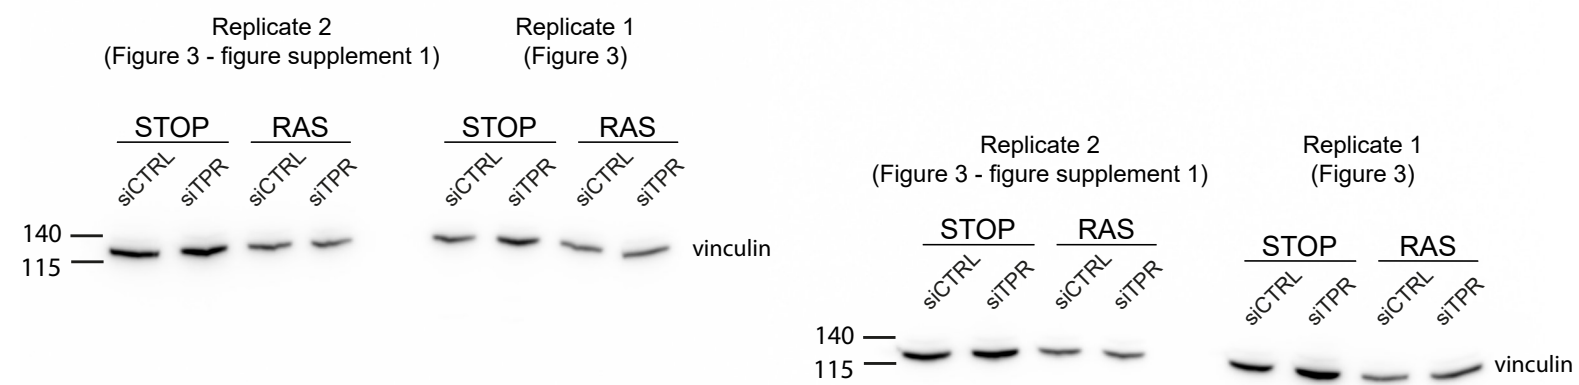

Supplement: fig3-data2 [file elife-101702-fig3-data2-v3.zip]

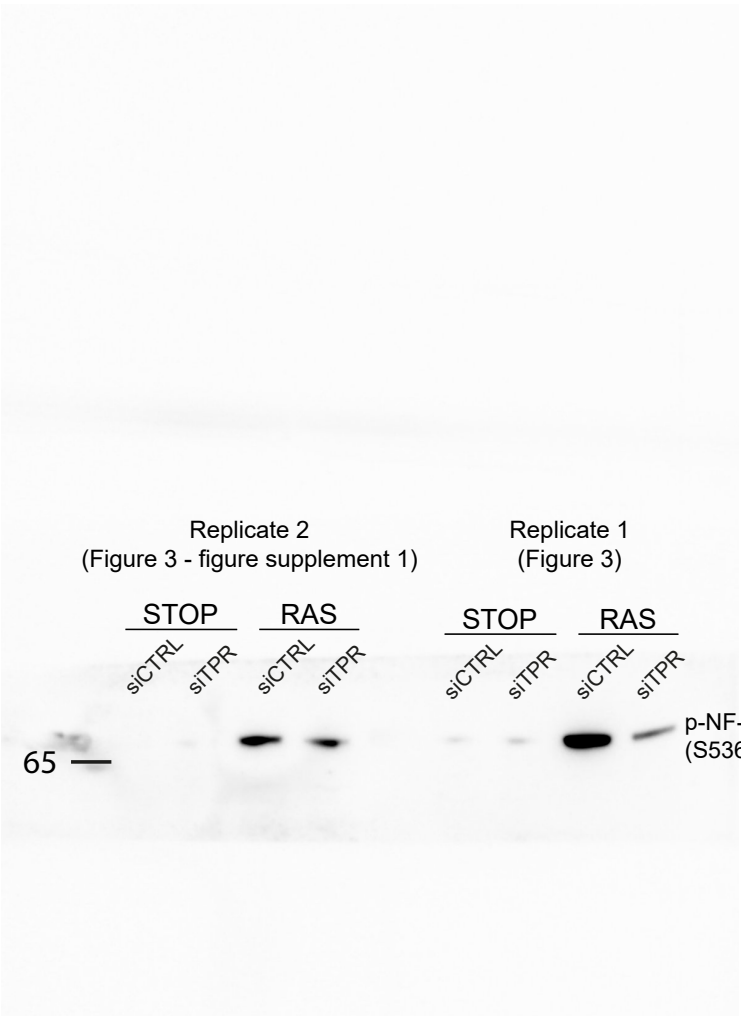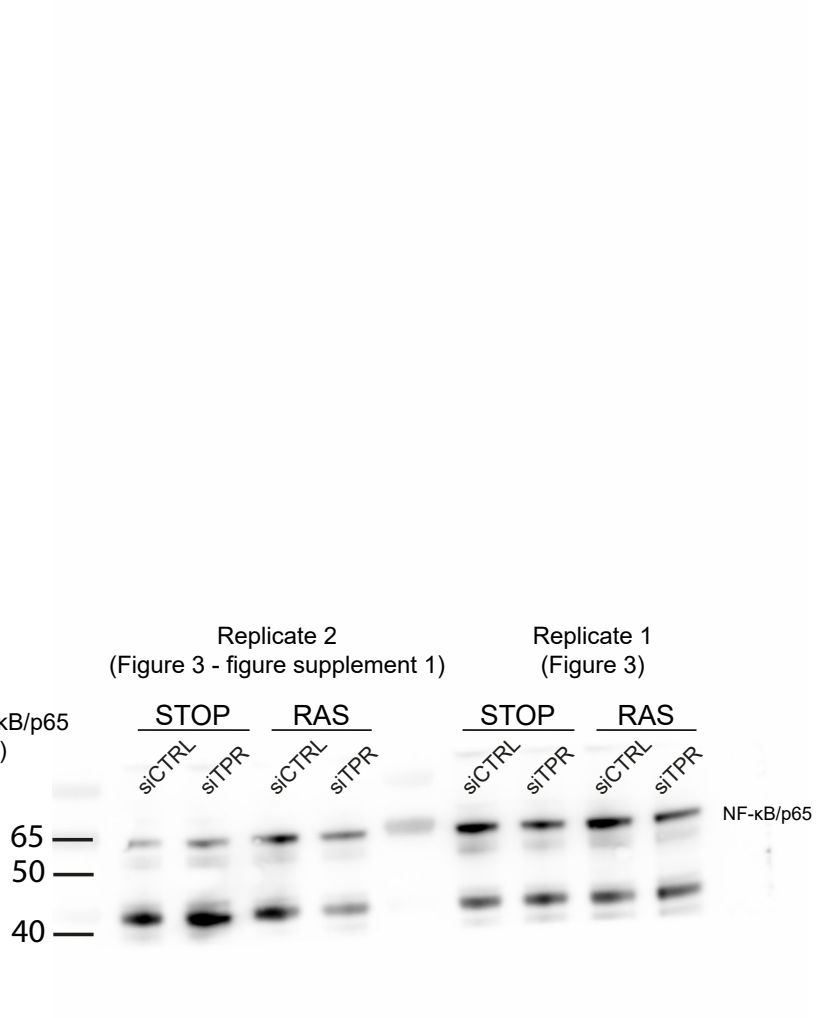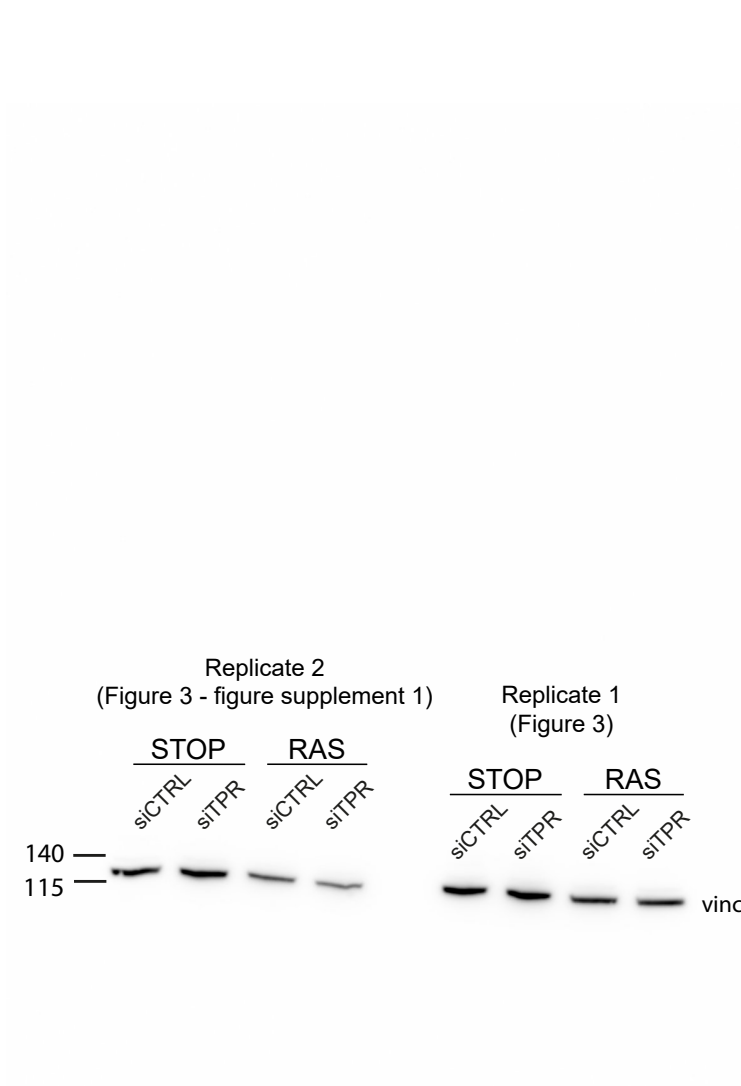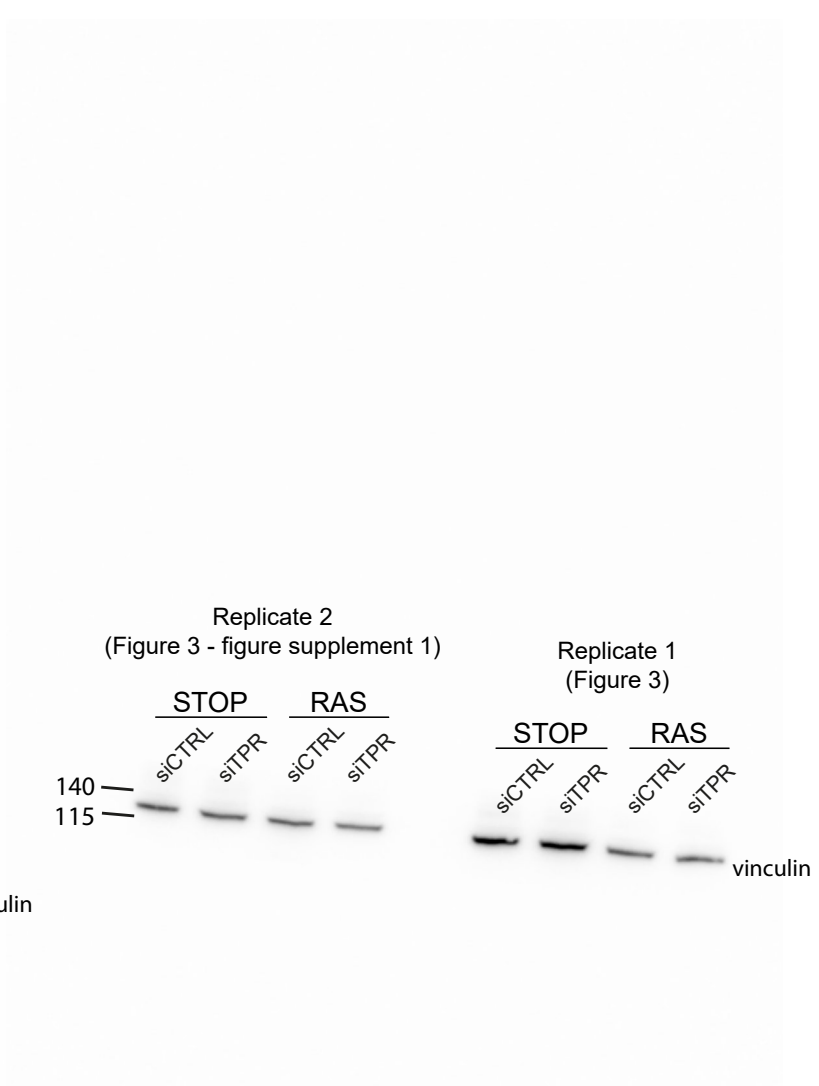

Supplement: fig3-data2 [file elife-101702-fig3-data2-v3.zip]

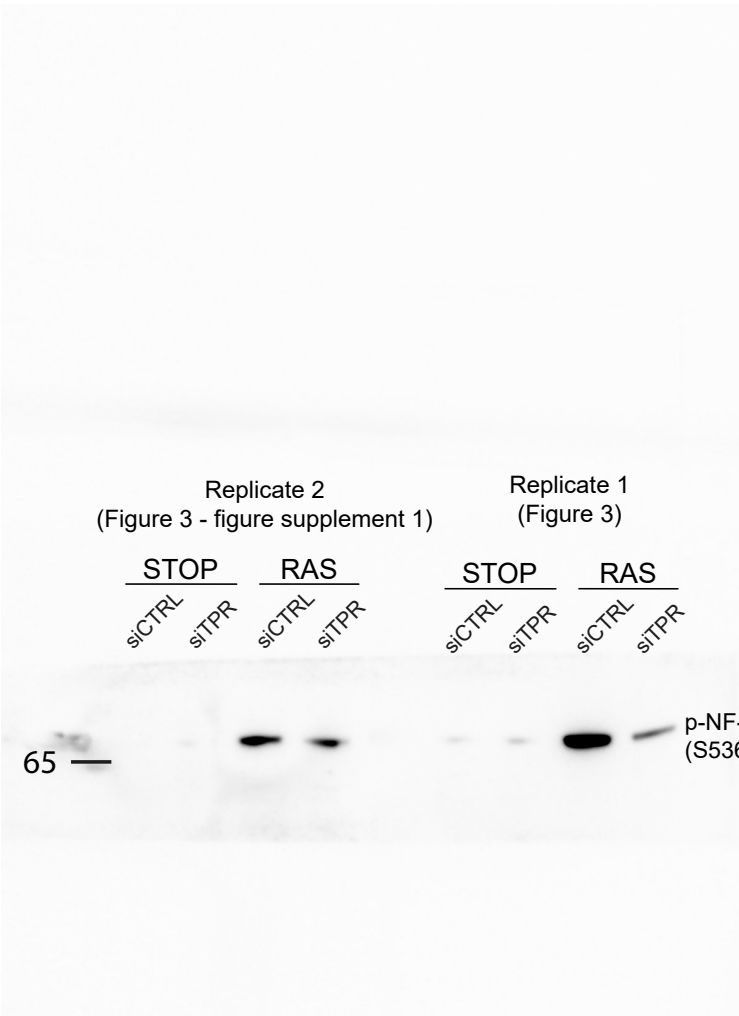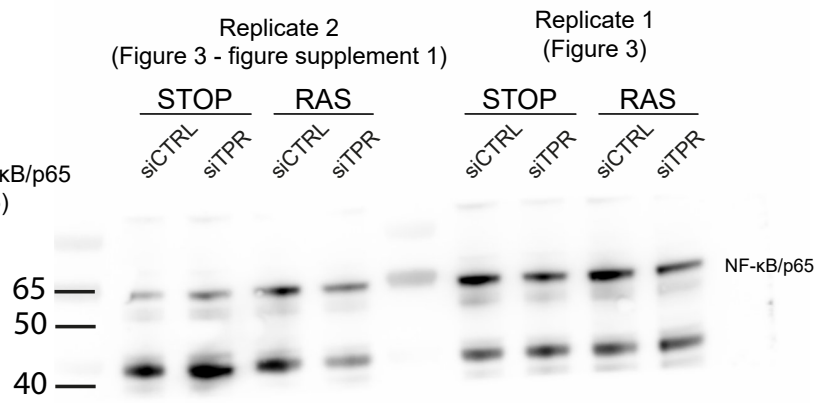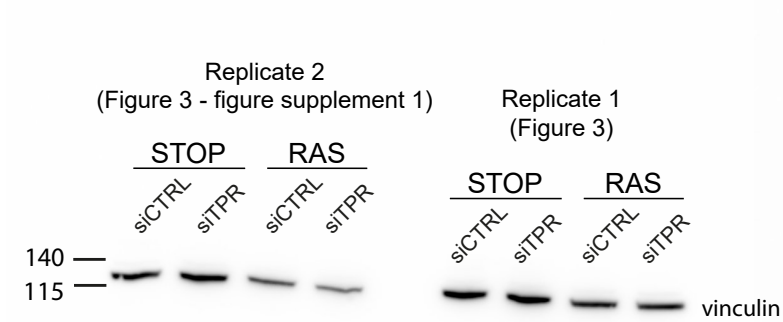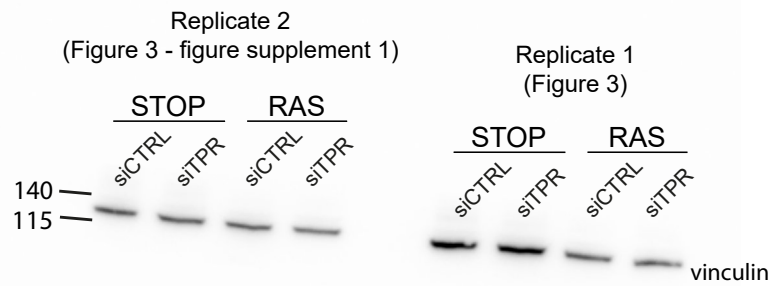

Supplement: fig3-figsupp1-data1 [file elife-101702-fig3-figsupp1-data1-v3.zip]

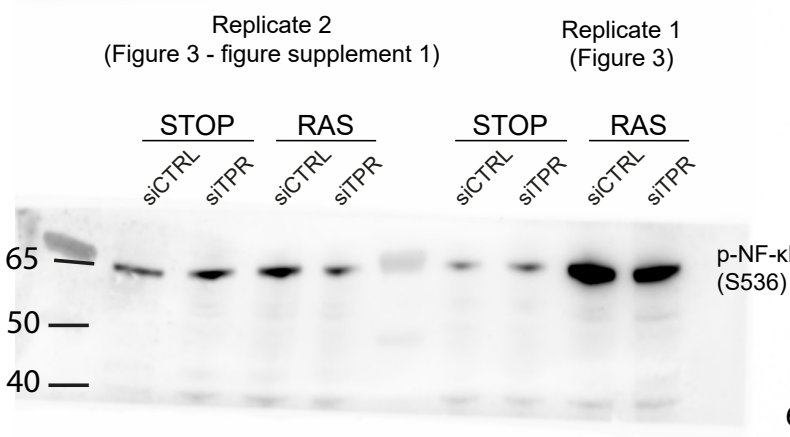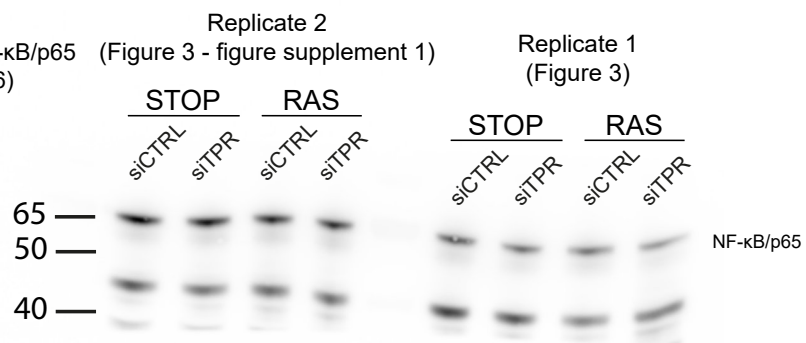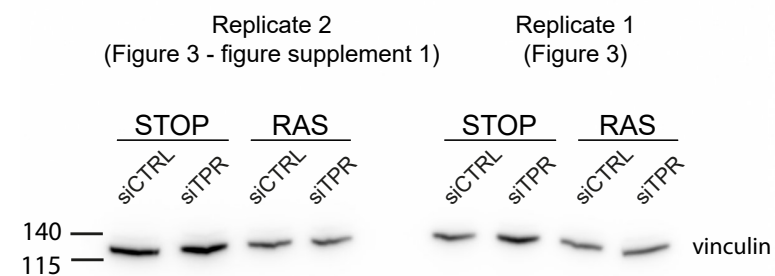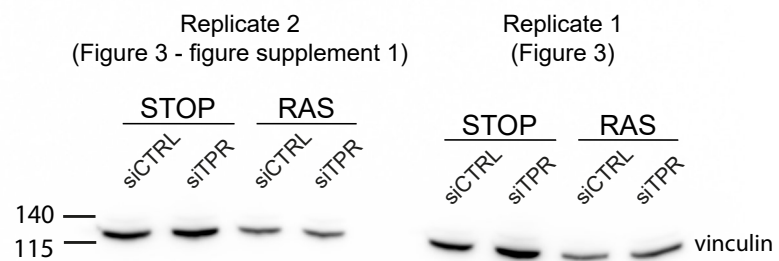

Supplement: fig3-figsupp1-data1 [file elife-101702-fig3-figsupp1-data1-v3.zip]

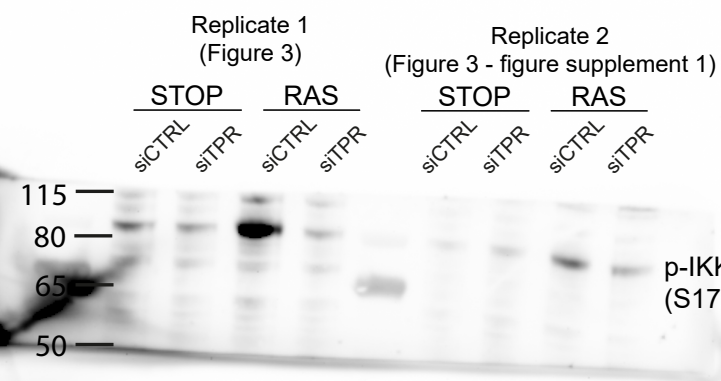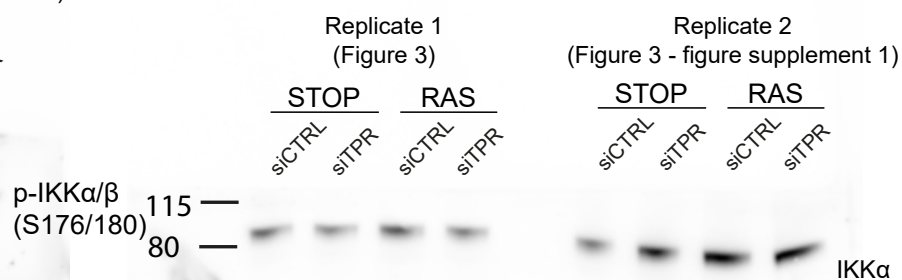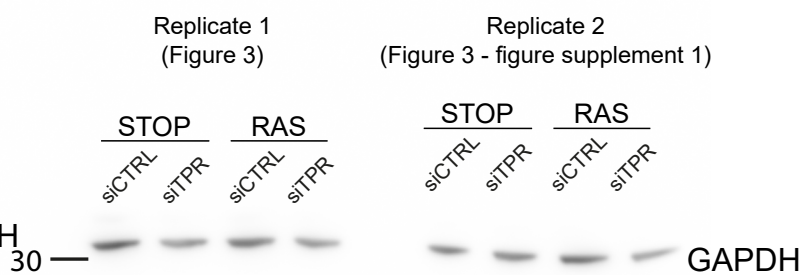

Supplement: fig3-figsupp1-data1 [file elife-101702-fig3-figsupp1-data1-v3.zip]

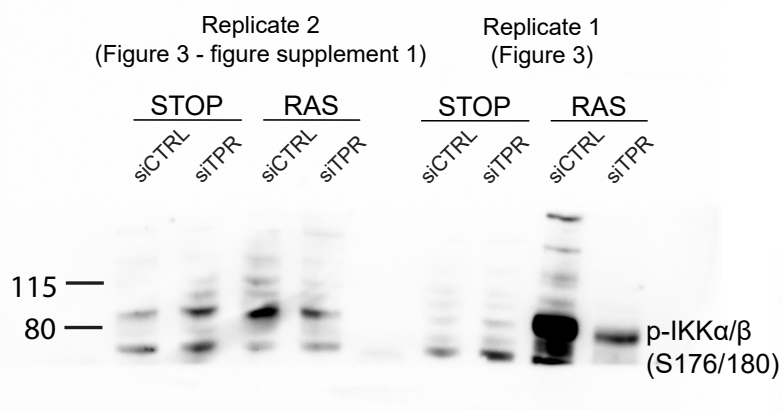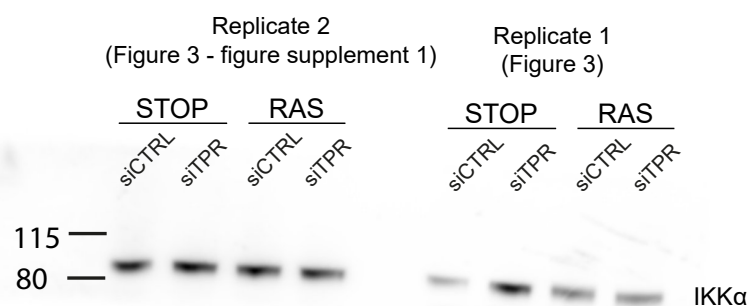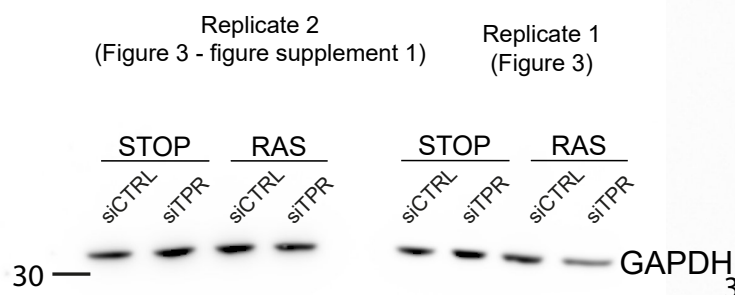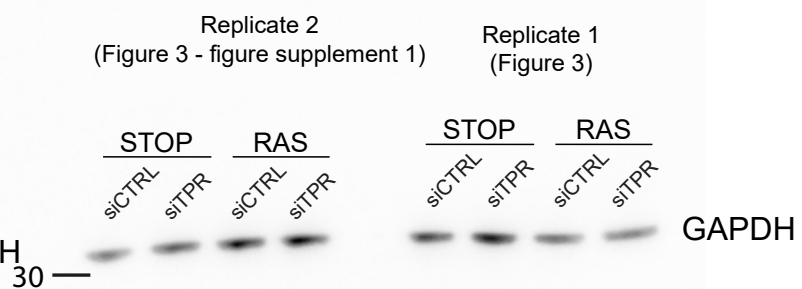

Supplement: fig3-figsupp1-data1 [file elife-101702-fig3-figsupp1-data1-v3.zip]

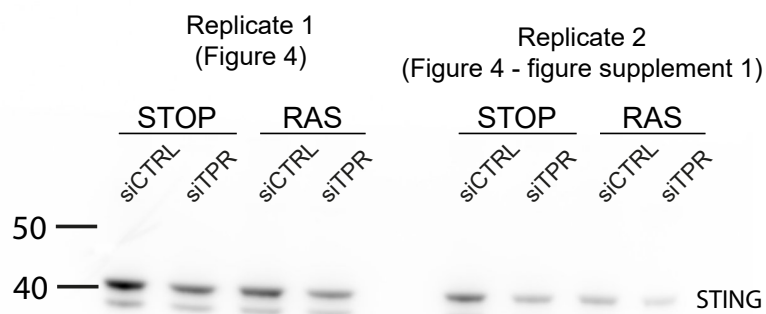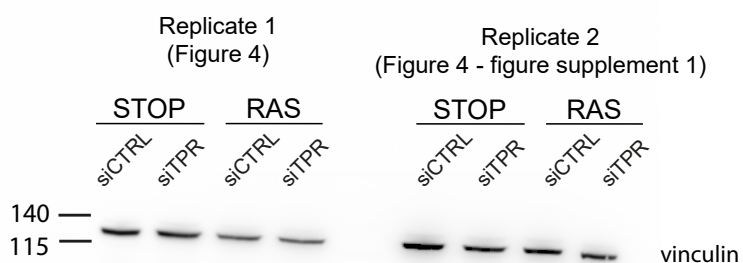

Supplement: fig4-data2 [file elife-101702-fig4-data2-v3.zip]

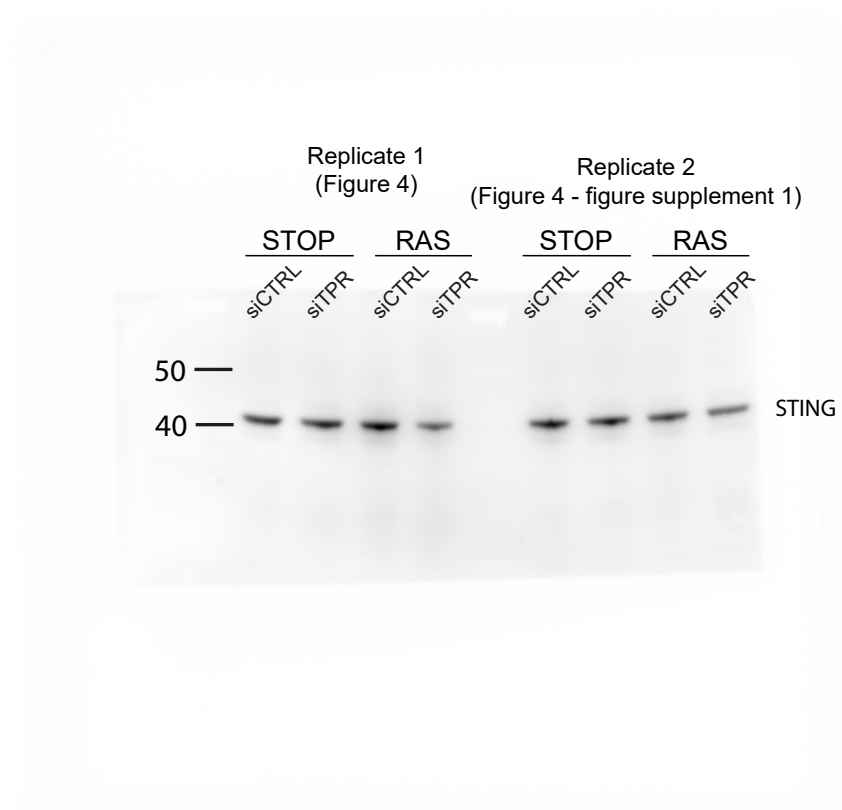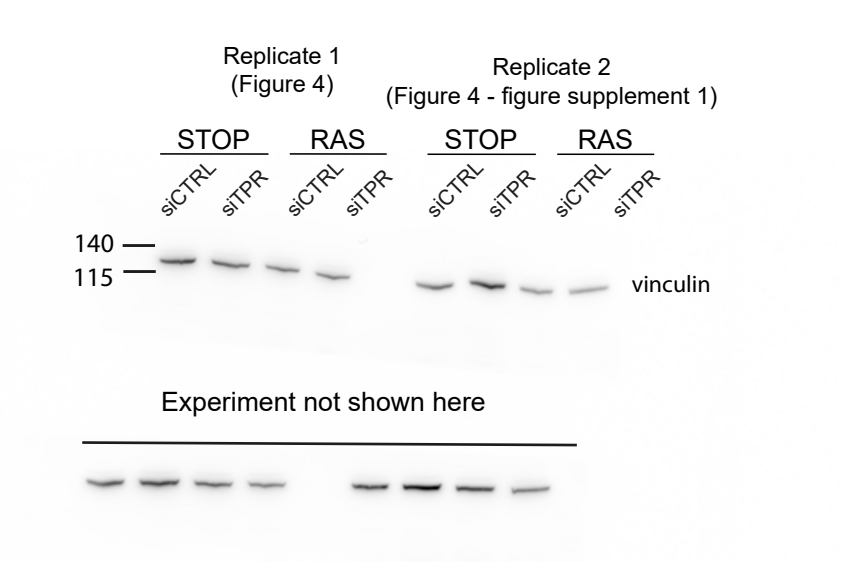

Supplement: fig4-data2 [file elife-101702-fig4-data2-v3.zip]

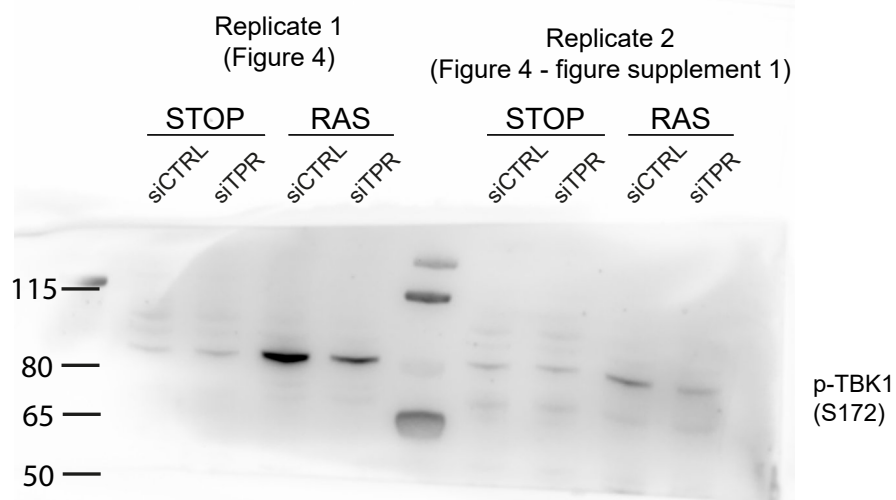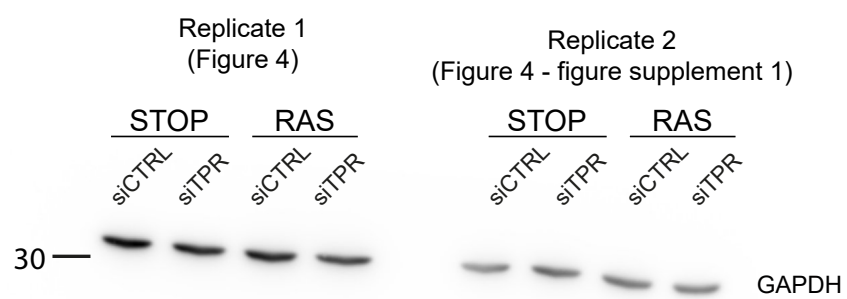

Supplement: fig4-data2 [file elife-101702-fig4-data2-v3.zip]
